# The American Journal of Psychiatry

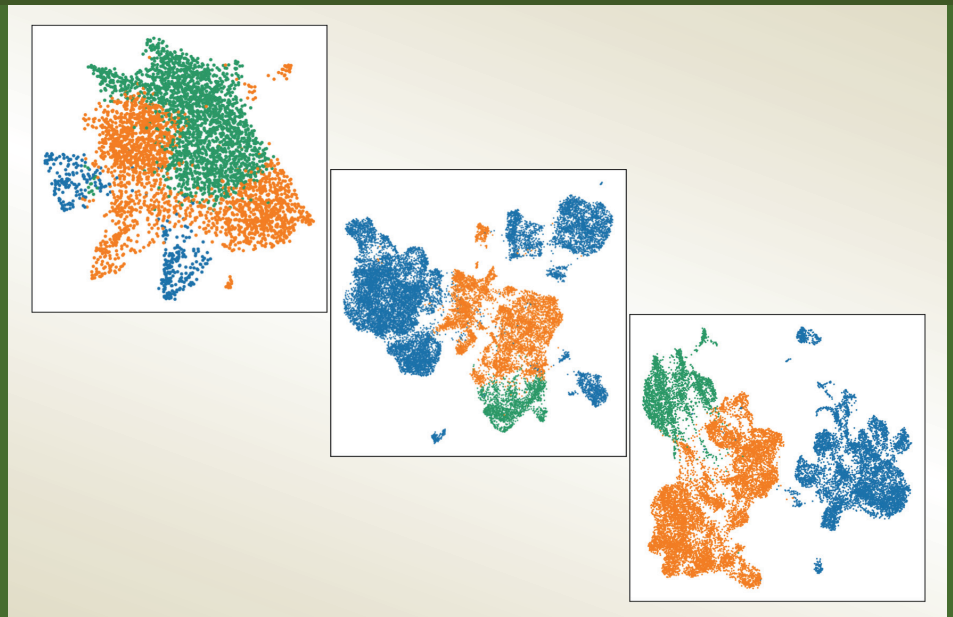

Using Stem Cell Models to Explore the Genetics  
Underlying Psychiatric Disorders

Longitudinal Changes in Structural Connectivity in Young  
People at High Genetic Risk for Bipolar Disorder

Long-Term Cannabis Use and Cognitive Reserves and  
Hippocampal Volume in Midlife

Cell-Type-Specific Impact of Glucocorticoid Receptor  
Activation on the Developing Brain
